# Supplementary material for: A spatially restricted fibrotic niche in pulmonary fibrosis is sustained by M-CSF/M-CSFR signalling in monocyte-derived alveolar macrophages
Source: PubMed Central journal article supplement — Eur Respir J. 2020 Jan 16;55(1):1900646. doi: 10.1183/13993003.00646-2019 (PMC6962769; doi:10.1183/13993003.00646-2019), 2020-01-16
Supplement: ERJ-00646-2019.Shareable.pdf [file ERJ-00646-2019.Shareable.pdf]

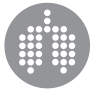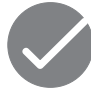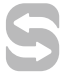

SHAREABLE PDF

# A spatially restricted fibrotic niche in pulmonary fibrosis is sustained by M-CSF/M-CSFR signalling in monocyte-derived alveolar macrophages

Nikita Joshi<sup>1,7</sup>, Satoshi Watanabe<sup>1,2,7</sup>, Rohan Verma<sup>1,7</sup>, Renea P. Jablonski<sup>1,3</sup>, Ching-I Chen<sup>1</sup>, Paul Cheresh<sup>1,4</sup>, Nikolay S. Markov<sup>1</sup>, Paul A. Reyfman<sup>1</sup>, Alexandra C. McQuattie-Pimentel<sup>1</sup>, Lango Sichizya<sup>1</sup>, Ziyang Lu<sup>1</sup>, Raul Piseaux-Aillon<sup>1</sup>, David Kirchenbuechler<sup>5</sup>, Annette S. Flozak<sup>1</sup>, Cara J. Gottardi<sup>1</sup>, Carla M. Cuda<sup>6</sup>, Harris Perlman<sup>6</sup>, Manu Jain<sup>1,4</sup>, David W. Kamp<sup>1,4</sup>, G.R. Scott Budinger<sup>1,4,8</sup> and Alexander V. Misharin<sup>1,8</sup>

**Affiliations:** <sup>1</sup>Division of Pulmonary and Critical Care Medicine, Dept of Medicine, Feinberg School of Medicine, Northwestern University, Chicago, IL, USA. <sup>2</sup>Dept of Respiratory Medicine, Kanazawa University Graduate School of Medical Sciences, Kanazawa, Japan. <sup>3</sup>Dept of Medicine, Section of Pulmonary and Critical Care, The University of Chicago, Chicago, IL, USA. <sup>4</sup>Dept of Medicine, Division of Pulmonary and Critical Care Medicine, Jesse Brown VA Medical Center, Chicago, IL, USA. <sup>5</sup>Center for Advanced Microscopy, Robert H. Lurie Cancer Center, Feinberg School of Medicine, Northwestern University, Chicago, IL, USA. <sup>6</sup>Division of Rheumatology, Dept of Medicine, Feinberg School of Medicine, Northwestern University, Chicago, IL, USA. <sup>7</sup>These authors contributed equally to this work. <sup>8</sup>These authors contributed equally to this work.

**Correspondence:** Alexander V. Misharin, Division of Pulmonary and Critical Care Medicine, Dept of Medicine, Feinberg School of Medicine, Northwestern University, Simpson Querrey Biomedical Research Center, 303 E. Superior Street, Chicago, IL 60611, USA. E-mail: a-misharin@northwestern.edu

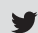

@ERSpublications

Monocyte-derived alveolar macrophages orchestrate the development of the fibrotic niche, causally related to fibrosis and maintained *via* M-CSF/M-CSFR signalling <http://bit.ly/2nDjS20>

**Cite this article as:** Joshi N, Watanabe S, Verma R, *et al.* A spatially restricted fibrotic niche in pulmonary fibrosis is sustained by M-CSF/M-CSFR signalling in monocyte-derived alveolar macrophages. *Eur Respir J* 2020; 55: 1900646 [<https://doi.org/10.1183/13993003.00646-2019>].

This single-page version can be shared freely online.

**ABSTRACT** Ontologically distinct populations of macrophages differentially contribute to organ fibrosis through unknown mechanisms.

We applied lineage tracing, single-cell RNA sequencing and single-molecule fluorescence *in situ* hybridisation to a spatially restricted model of asbestos-induced pulmonary fibrosis.

We demonstrate that tissue-resident alveolar macrophages, tissue-resident peribronchial and perivascular interstitial macrophages, and monocyte-derived alveolar macrophages are present in the fibrotic niche. Deletion of monocyte-derived alveolar macrophages but not tissue-resident alveolar macrophages ameliorated asbestos-induced lung fibrosis. Monocyte-derived alveolar macrophages were specifically localised to fibrotic regions in the proximity of fibroblasts where they expressed molecules known to drive fibroblast proliferation, including platelet-derived growth factor subunit A. Using single-cell RNA sequencing and spatial transcriptomics in both humans and mice, we identified macrophage colony-stimulating factor receptor (M-CSFR) signalling as one of the novel druggable targets controlling self-maintenance and persistence of these pathogenic monocyte-derived alveolar macrophages. Pharmacological blockade of M-CSFR signalling led to the disappearance of monocyte-derived alveolar macrophages and ameliorated fibrosis.

Copyright ©ERS 2020. This article is open access and distributed under the terms of the Creative Commons Attribution Non-Commercial Licence 4.0.

Our findings suggest that inhibition of M-CSFR signalling during fibrosis disrupts an essential fibrotic niche that includes monocyte-derived alveolar macrophages and fibroblasts during asbestos-induced fibrosis.
